# Supplementary material
Source: HighWire-hosted journal article supplement (https://erj.ersjournals.com/content/56/3/2000925)
Supplement: inline-supplementary-material-1 [file inline-supplementary-material-1.pdf]

## **Supplemental Material**

### **Methods**

#### **Patient treatment**

VA-ECMO was utilized to stabilize hemodynamics, enable transfer from a referral hospital, perform extracorporeal-cardiopulmonary resuscitation, or to treat biventricular failure. Implantation of an Impella was performed in patients with CS with left-ventricular (LV) failure or LV distension on VA-ECMO. Impella implantation, positioning and anticoagulation were performed as previously described.[1] Management of sympathomimetic inotropic and vasopressor agent was performed at the estimation of the clinician in charge targeting decrease of drugs account, dosis and duration to minimize the risk of mediated end-organ failure. Target blood pressure was defined as MAP  $\geq 65$  mmHg and SBP  $\geq 80$  mmHg or individualized determined by the treating clinician. However, despite our institutional standards, we thus cannot exclude bias. Appropriateness of end-organ perfusion was verified by considering markers of systemic perfusion: arterial lactate, central or mixed venous oxygen saturation, urine output, and if a pulmonary artery catheter was considered: cardiac output, pulmonary capillary wedge pressure, and peripheral vascular resistance.

A left ventricular endomyocardial biopsy (EMB) was obtained if the procedure was considered safe by the interventional cardiologist at the time of Impella implantation.

Clinical parameters, complications, and demographic characteristics were continuously documented in a standard patient file and data monitoring system. Patients were followed-up until 30 days. Records were extracted from the electronic hospital patient data management system. In case of discharge before 30 days after admission consecutive outpatient visits and/or chart review were performed. No patient was lost to follow-up.,

## **Propensity score matching**

To minimize confounding bias due to the non-randomized nature of the investigation, to yield a balanced distribution of baseline characteristics and to estimate effects of dual circulatory support with Impella and VA-ECMO in patients with Influenza-related myocarditis and rCS a propensity score matching was performed to patients with rCS due to acute myocardial infarction (AMI-rCS group) and to patients with non-ischemic cardiomyopathy complicated by rCS (DCM-rCS group). Propensity scores were estimated using multivariable logistic regression modelling accounting for variables related to the outcome [2]: biventricular failure at baseline, out-of-hospital cardiac arrest with initial shockable rhythm and duration from shock to first device [hours]. Cases of influenza related myocarditis and control groups were matched stepwise on the logit of the estimated propensity score (1:2 propensity score matching) using a nearest neighbor model using calipers width equal to 0.15. In our study a lower caliper width was used in order to maximize correct matching and to reduce bias.

To validate the method and perform a sensitivity analysis of the propensity score matching, the primary outcome (30-day mortality) was reanalyzed using the entire (unmatched) cohort (Supplemental Fig S1)

## **Review of the literature**

Literature review between 2013 and 2019 was performed using PubMed search engine and the following criteria: influenza, myocarditis, mechanical circulatory support. Original research articles, Case reports, and case series handling with adult patients with verified influenza virus infection, proven or suspected myocarditis, cardiogenic shock and MCS using VA-ECMO and/or Impella were eligible. Manuscripts with limited clinical information were excluded. Parameters were selected as follows: Influenza virus type, patients` characteristics (i.a. pre-existing conditions, vaccination status, occurrence of cardiac arrest), use of inotropes/vasopressors, mechanical ventilation, lactate levels, complications (i.a. renal replacement therapy, pericardial effusion, pneumonia), type of MCS, intention to treat, outcome data.

**Supplemental Table S1: Patient characteristics**

|                            |             | Patients with Influenza related<br>myocarditis complicated by<br>cardiogenic shock | Patients with myocardial<br>infarction complicated by<br>cardiogenic shock |                            | Patients with non-ischemic<br>cardiomyopathy complicated<br>by cardiogenic shock |                            |
|----------------------------|-------------|------------------------------------------------------------------------------------|----------------------------------------------------------------------------|----------------------------|----------------------------------------------------------------------------------|----------------------------|
|                            |             | n= 7                                                                               | n= 14                                                                      | P Influenza-rCS vs AMI-rCS | n=14                                                                             | P Influenza-rCS vs DCM-rCS |
| height [cm]                |             | 175±6                                                                              | 172±12                                                                     | ns                         | 176±9                                                                            | ns                         |
| weight [kg]                |             | 81±14                                                                              | 86±12                                                                      | ns                         | 87±18                                                                            | ns                         |
| pre-existing disease       |             |                                                                                    |                                                                            |                            |                                                                                  |                            |
|                            | stroke      | 0                                                                                  | 1 (7%)                                                                     | ns                         | 1 (7%)                                                                           | ns                         |
|                            | PAD         | 0                                                                                  | 1 (7%)                                                                     | ns                         | 1 (7%)                                                                           | ns                         |
| myocardial infarction      |             | 0                                                                                  | 14 (100%)                                                                  |                            | 0                                                                                |                            |
|                            | STEMI       | 0                                                                                  | 11 (79%)                                                                   |                            | 0                                                                                |                            |
|                            | NSTEMI      | 0                                                                                  | 3 (21%)                                                                    |                            | 0                                                                                |                            |
| cardiomyopathy             |             |                                                                                    |                                                                            |                            |                                                                                  |                            |
|                            | myocarditis | 7 (100%)                                                                           | 0                                                                          |                            | 0                                                                                |                            |
|                            | dilative    |                                                                                    | 0                                                                          |                            | 14 (100%)                                                                        |                            |
| extrahospital thrombolysis |             | 0                                                                                  | 4 (29%)                                                                    | ns                         | 2 (14%)                                                                          | ns                         |

AMI-rCS- Patients with myocardial infarction related refractory cardiogenic shock, DCM-rCS- Patients with non-ischemic cardiomyopathy related refractory cardiogenic shock, NSTEMI- Non-ST-elevation myocardial infarction, PAD- Peripheral artery disease, STEMI- ST-elevation myocardial infarction

**Supplemental Table S2: Intensive care and mechanical circulatory support**

|                                        |                                     | Patients with Influenza related<br>myocarditis complicated by<br>cardiogenic shock<br><br>n= 7 | Patients with myocardial<br>infarction complicated by<br>cardiogenic shock<br><br>n= 14 |                            | Patients with non-ischemic<br>cardiomyopathy<br>complicated by cardiogenic<br>shock<br>n=14 |                            |
|----------------------------------------|-------------------------------------|------------------------------------------------------------------------------------------------|-----------------------------------------------------------------------------------------|----------------------------|---------------------------------------------------------------------------------------------|----------------------------|
|                                        |                                     |                                                                                                |                                                                                         | P Influenza-rCS vs AMI-rCS |                                                                                             | P Influenza-rCS vs DCM-rCS |
| in-hospital stay [days]                |                                     | 3 [1-16]                                                                                       | 18 [1-25]                                                                               | ns                         | 14 [5-36]                                                                                   | <b>0.025</b>               |
| mechanical ventilation                 |                                     | 7 (100%)                                                                                       | 14 (100%)                                                                               | ns                         | 14 (100%)                                                                                   | ns                         |
| coronary angiography                   |                                     | 7 (100%)                                                                                       | 14 (100%)                                                                               | ns                         | 14 (100%)                                                                                   | ns                         |
| PCI performed                          |                                     | 1 (14%)                                                                                        | 14 (100%)                                                                               | <b>0.005</b>               | 0                                                                                           | ns                         |
| type of Impella                        |                                     |                                                                                                |                                                                                         | ns                         |                                                                                             | ns                         |
|                                        | 2.5                                 | 1 (14%)                                                                                        | 2 (14%)                                                                                 |                            | 2 (14%)                                                                                     |                            |
|                                        | CP                                  | 6 (86%)                                                                                        | 12 (86%)                                                                                |                            | 12 (86%)                                                                                    |                            |
| shock to Impella-insertion-<br>time    |                                     |                                                                                                |                                                                                         | ns                         |                                                                                             | ns                         |
|                                        | <6 hours                            | 2 (29%)                                                                                        | 9 (64%)                                                                                 |                            | 4 (29%)                                                                                     |                            |
|                                        | 6-12 hours                          | 1 (14%)                                                                                        | 0                                                                                       |                            | 1 (7%)                                                                                      |                            |
|                                        | 12-24 hours                         | 1 (14%)                                                                                        | 1 (7%)                                                                                  |                            | 0                                                                                           |                            |
|                                        | >24 hours                           | 2 (29%)                                                                                        | 4 (29%)                                                                                 |                            | 9 (64%)                                                                                     |                            |
| duration of Impella-support<br>[hours] |                                     | 28 [11- 326]                                                                                   | 129 [28-203]                                                                            | ns                         | 80 [64-147]                                                                                 | ns                         |
| ECMO support                           |                                     | 7 (100%)                                                                                       | 14 (100%)                                                                               | ns                         | 14 (100%)                                                                                   | ns                         |
|                                        | duration of ECMO<br>support [hours] | 43 [14-312]                                                                                    | 196 [23-331]                                                                            | ns                         | 114 [94-166]                                                                                | ns                         |
|                                        | duration shock to                   | 20 [2-32]                                                                                      | 10 [4-23]                                                                               | ns                         | 20 [3-30]                                                                                   | ns                         |

|  |              |  |  |  |  |  |
|--|--------------|--|--|--|--|--|
|  | ECMO [hours] |  |  |  |  |  |
|--|--------------|--|--|--|--|--|

AMI-rCS- Patients with myocardial infarction related refractory cardiogenic shock, DCM-rCS- Patients with non-ischemic cardiomyopathy related refractory cardiogenic shock, ECMO- Extracorporeal membrane oxygenation, Influenza-rCS- Patients with influenza associated refractory cardiogenic shock, PCI- Percutaneous coronary intervention, VA- Veno-arterial

**Supplemental Table S3: Outcome**

|                     | Patients with Influenza related<br>myocarditis complicating<br>cardiogenic shock<br><br>n= 7 | Patients with myocardial<br>infarction complicated by<br>cardiogenic shock<br><br>n= 14 |                            | Patients with non-ischemic<br>cardiomyopathy<br>complicated by cardiogenic<br>shock<br>n=14 |                            |
|---------------------|----------------------------------------------------------------------------------------------|-----------------------------------------------------------------------------------------|----------------------------|---------------------------------------------------------------------------------------------|----------------------------|
|                     |                                                                                              |                                                                                         | P Influenza-rCS vs AMI-rCS |                                                                                             | P Influenza-rCS vs DCM-rCS |
| hemolysis           | 1 (14%)                                                                                      | 4 (29%)                                                                                 | ns                         | 10 (71%)                                                                                    | <b>0.013</b>               |
| anoxic brain damage | 1 (14%)                                                                                      | 2 (14%)                                                                                 | ns                         | 1 (7%)                                                                                      | ns                         |
| TIMI bleeding       |                                                                                              |                                                                                         | ns                         |                                                                                             | ns                         |
| none                | 2 (29%)                                                                                      | 6 (43%)                                                                                 |                            | 8 (57%)                                                                                     |                            |
| minimal             | 3 (43%)                                                                                      | 1 (7%)                                                                                  |                            | 4 (29%)                                                                                     |                            |
| minor               | 2 (29%)                                                                                      | 7 (50%)                                                                                 |                            | 2 (14%)                                                                                     |                            |
| major               | 0                                                                                            | 0                                                                                       |                            | 0                                                                                           |                            |

AMI-rCS- Patients with myocardial infarction related refractory cardiogenic shock, DCM-rCS- Patients with non-ischemic cardiomyopathy related refractory cardiogenic shock, Influenza-rCS- Patients with influenza associated refractory cardiogenic shock

**Supplemental Table S4:** Summary of case reports (2013-2019) targeting adult patients with influenza-related cardiogenic shock requiring mechanical circulatory support (VA-ECMO and/or Impella) and additional administration of inotropes/vasopressors.

| Parameter                      | Larsen TR et al.[3] | Taremi M et al. [4] | Hamoudi A et al. [5] | Ciabatti M et al. [6] | Marchetti L et al.[7]          | Siskin M et al. [8] | Hekimian G et al. [9] | Hekimian G et al. [9] | Hekimian G et al. [9] | Hekimian G et al. [9] |
|--------------------------------|---------------------|---------------------|----------------------|-----------------------|--------------------------------|---------------------|-----------------------|-----------------------|-----------------------|-----------------------|
| virus (RT-PCR)                 | A (H1N1)            | B                   | A (H1N1)             | B                     | B                              | B                   | B                     | B                     | B                     | B                     |
| age [y]                        | 41                  | 52                  | 25                   | 66                    | 44                             | 22                  | 28                    | 35                    | 43                    | 39                    |
| sex                            | F                   | F                   | F                    | M                     | M                              | F                   | F                     | F                     | F                     | M                     |
| pre-existing conditions        | N                   | N                   | Nicotine             | N                     | Nicotine, Non-Hodgkin lymphoma | N                   | Ectopic pregnancy     | N                     | Multiple sclerosis    | N                     |
| vaccination                    | NN                  | NN                  | NN                   | NN                    | N                              | NN                  | NN                    | NN                    | NN                    | NN                    |
| transferred in CS              | N                   | Y                   | Y                    | N                     | Y                              | N                   | N                     | N                     | Y                     | N                     |
| beginning of flu-like symptoms | -4d                 | -6d                 | -7d                  | -2d                   | -2d                            | -14d                | -3d                   | -3d                   | -5d                   | -5d                   |
| Mechanical ventilation         | Y                   | Y                   | NN                   | NN                    | Y                              | NN                  | NN                    | NN                    | NN                    | NN                    |
| peak lactate [mmol/L]          | 8.8                 | 8.2                 | NN                   | 11                    | NN                             | 4                   | 9.8                   | 10                    | 3.7                   | 14.4                  |
| inotropes/vasopressors         | Y (n=1, NE)         | Y (n=1, NE)         | Y (n=2, NE, D)       | Y (n=2, NE, D)        | Y (n=2, NE, D)                 | Y (n=1, D)          | Y (n=1, D)            | Y (n=2, E, D)         | Y (n=1, D)            | Y (n=1, D)            |
| LVEF [%]                       | 30                  | 10                  | 35                   | 10                    | 15                             | 10                  | 20                    | 10                    | 10                    | 10                    |
| PE                             | Y                   | N                   | N                    | Y                     | Y                              | Y                   | Y                     | Y                     | Y                     | Y                     |
| MCS                            | IABP/ Impella 2.5   | VA-ECMO             | VA-ECMO              | IABP + VA-ECMO        | VA-ECMO/ IABP                  | Impella             | VA-ECMO               | IABP + VA-ECMO        | VA-ECMO               | VA-ECMO               |
| cardiac arrest                 | Y                   | N                   | N                    | Y                     | N                              | N                   | N                     | N                     | N                     | N                     |
| biventricular failure          | NN                  | N                   | N                    | N                     | Y                              | N                   | NN                    | Y                     | NN                    | Y                     |
| ARDS                           | N                   | N                   | N                    | N                     | N                              | N                   | N                     | N                     | N                     | N                     |
| secondary pneumonia            | N                   | N                   | N                    | N                     | N                              | N                   | N                     | N                     | N                     | N                     |
| RRT                            | Y                   | N                   | N                    | Y                     | N                              | N                   | N                     | Y                     | N                     | Y                     |
| bridge to                      | Destination         | Recovery            | Destination          | Recovery              | Recovery                       | Recovery            | Recovery              | Recovery              | Recovery              | Recovery              |
| in-hospital survival           | N                   | Y                   | N                    | Y                     | Y                              | Y                   | Y                     | Y                     | Y                     | Y                     |

ARDS- acute respiratory distress syndrome, CS- cardiogenic shock, D- dobutamine, E-epinephrine, F- female, IABP- intra-aortic balloon pump, LVEF- left ventricular ejection fraction, M- male, MCS- mechanical circulatory support, N- no, NE- norepinephrine NN- not reported, PE- pericardial effusion, RRT- renal replacement therapy, VA-ECMO- venou-arterial extracorporeal membrane oxygenation, Y- yes



**Supplemental Figure S1: Kaplan-Meier curves comparing 30 day survival between the Influenza group and the unmatched groups of patients with AMI related rCS (A) and patients with DCM related rCS (B)**

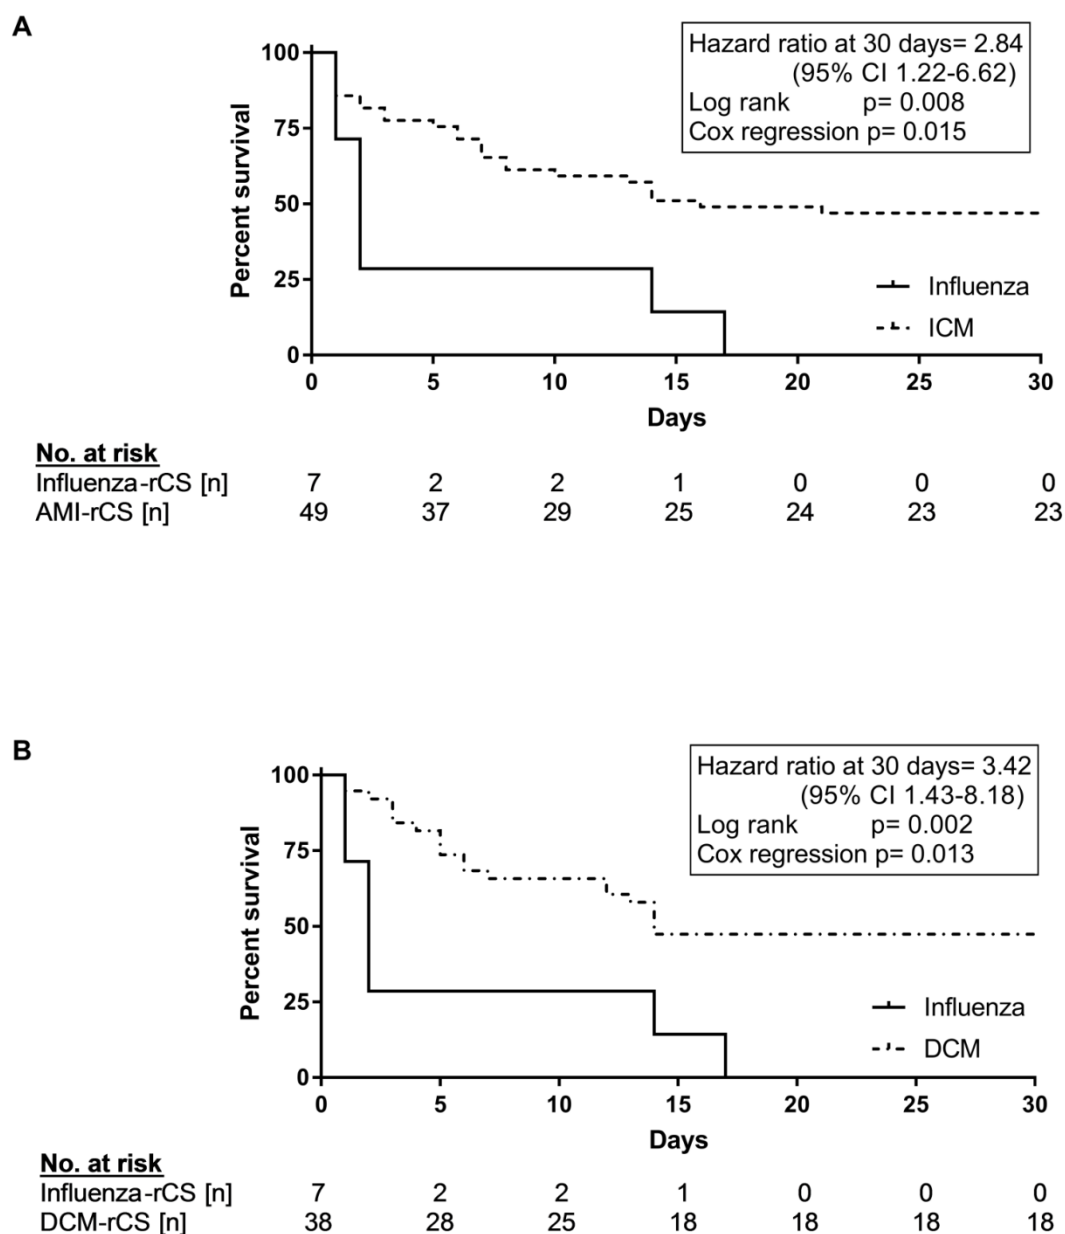

AMI-rCS- Patients with myocardial infarction related refractory cardiogenic shock, CI- Confidence interval, DCM-rCS- Patients with non-ischemic cardiomyopathy related refractory cardiogenic shock, Influenza-rCS- Patients with influenza associated refractory cardiogenic shock

**Supplemental Figure S2: Course of AST, ALT and eGFR in patients with influenza associated myocarditis related refractory cardiogenic shock**

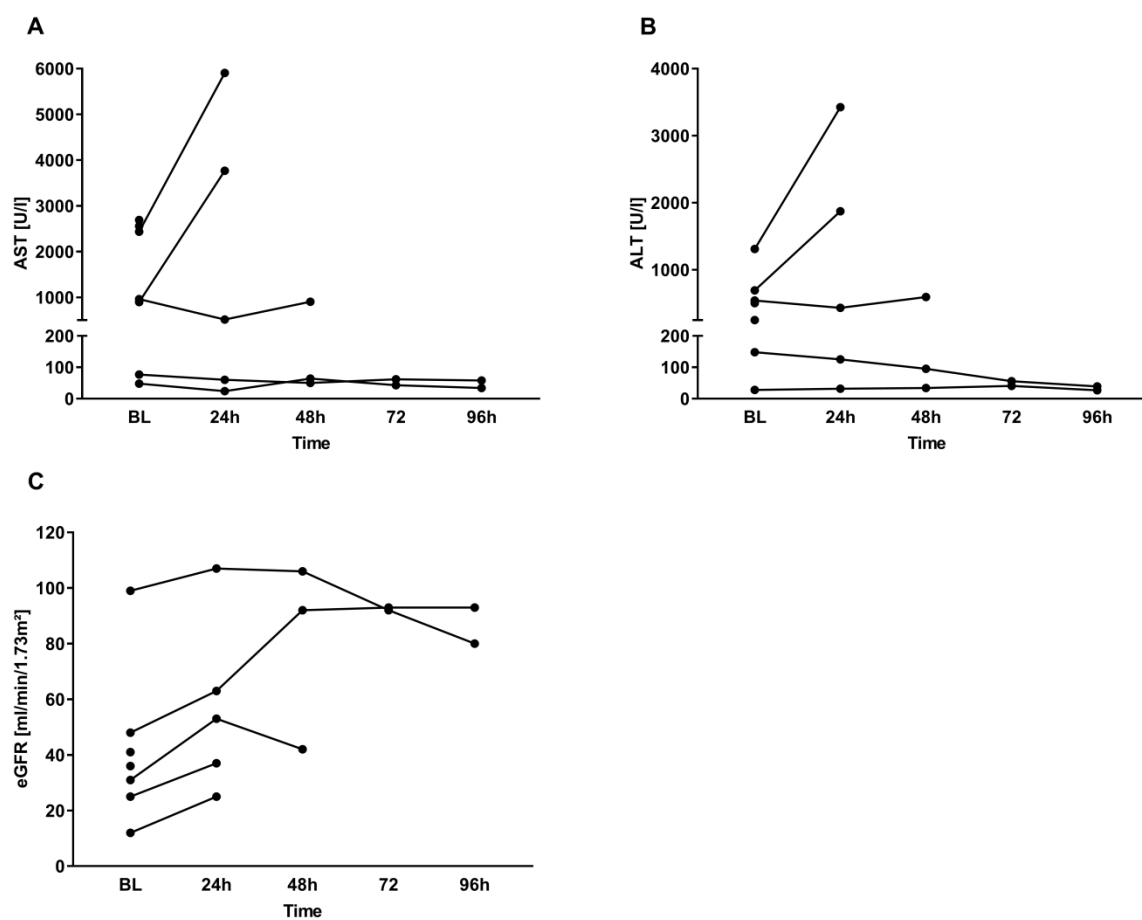

**A:** AST over time, **B:** ALT over time, **C:** eGFR over time

ALT- Alanine aminotransferase, AST- Aspartate aminotransferase, BL- Baseline, eGFR- estimated glomerular filtration rate

## References

1. Sieweke JT, Berliner D, Tongers J, et al: Mortality in patients with cardiogenic shock treated with the Impella CP microaxial pump for isolated left ventricular failure. *Eur Heart J Acute Cardiovasc Care* 2018;2048872618757393
2. Tongers J, Sieweke JT, Kuhn C, Napp LC, Flierl U, Rontgen P, Schmitto JD, Sedding DG, Haverich A, Bauersachs J, Schafer A. Early Escalation of Mechanical Circulatory Support Stabilizes and Potentially Rescues Patients in Refractory Cardiogenic Shock. *Circ Heart Fail* 2020; 13: e005853.
3. Larsen TR, Kinni V, Zaks J, et al: A lethal case of influenza and type 5 cardiorenal syndrome. *Blood Purif* 2013;36:112-115
4. Taremi M, Amoroso A, Nace HL, et al: Influenza B-induced refractory cardiogenic shock: a case report. *BMC Infect Dis* 2013;13:452-2334-13-452
5. Hamoudi A, Vais D, Taqi V: H1N1 Influenza Causing Fulminant Myocarditis Requiring Extracorporeal Membrane Oxygenation. *Cureus* 2019;11:e4665
6. Ciabatti M, Vignini E, Mattesini A, et al: Why can flu be so deadly? An unusual case of cardiogenic shock. *Intern Emerg Med* 2019;
7. Marchetti L, Gandolfo C, Maglioni E, et al: Myocarditis requiring extracorporeal membrane oxygenation support following Influenza B infection: a case report and literature review. *New Microbiol* 2019;42:61-63
8. Siskin M, Rao S, Rapkiewicz A, et al: A Case of Cardiogenic Shock Secondary to Complement-Mediated Myopericarditis From Influenza B Infection. *Can J Cardiol* 2017;33:1335.e1-1335.e3
9. Hekimian G, Jovanovic T, Brechot N, et al: When the heart gets the flu: Fulminant influenza B myocarditis: A case-series report and review of the literature. *J Crit Care* 2018;47:61-64
