# Supplementary material
Source: HighWire-hosted journal article supplement (https://erj.ersjournals.com/content/56/3/2000925)
Supplement: inline-supplementary-material-2 [file inline-supplementary-material-2.pdf]

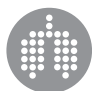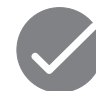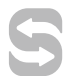

SHAREABLE PDF

# Mechanical circulatory support in refractory cardiogenic shock due to influenza virus-related myocarditis

Jan-Thorben Sieweke <sup>1,6</sup>, Muharrem Akin<sup>1,6</sup>, Sebastian Stetskamp<sup>1</sup>, Christian Riehle<sup>1</sup>, Danny Jonigk<sup>2</sup>, Ulrike Flierl<sup>1</sup>, Tobias J. Pfeffer<sup>1</sup>, Valentin Hirsch<sup>1</sup>, Jochen Dutzmann<sup>3</sup>, Marius M. Hoeper <sup>4</sup>, Christian Kühn<sup>5</sup>, Johann Bauersachs <sup>1</sup> and Andreas Schäfer<sup>1</sup>

**Affiliations:** <sup>1</sup>Cardiac Arrest Center and Advanced Heart Failure Unit, Dept of Cardiology and Angiology, Hannover Medical School, Hannover, Germany. <sup>2</sup>Dept of Pathology, Hannover Medical School, Hannover, Germany. <sup>3</sup>Mid-German Heart Center, Dept of Cardiology, Angiology, and Intensive Care Medicine, University Hospital, Martin Luther University Halle-Wittenberg, Halle (Saale), Germany. <sup>4</sup>Dept of Respiratory Medicine and the German Center for Lung Research (DZL), Hannover Medical School, Hannover, Germany. <sup>5</sup>Dept of Cardiothoracic, Transplant and Vascular Surgery, Hannover Medical School, Hannover, Germany. <sup>6</sup>These authors contributed equally to the manuscript.

**Correspondence:** Jan-Thorben Sieweke, Dept of Cardiology and Angiology, Hannover Medical School, Carl-Neuberg-Straße 1, 30625 Hannover, Germany. E-mail: sieweke.jan-thorben@mh-hannover.de

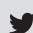

@ERSpublications

**Combined mechanical circulatory support in refractory cardiogenic shock (ECMELLA) might not salvage patients with influenza-associated myocarditis and severe end-organ damage, in contrast to the favourable effects in primary cardiac causes** <https://bit.ly/3dmonC4>

**Cite this article as:** Sieweke J-T, Akin M, Stetskamp S, *et al.* Mechanical circulatory support in refractory cardiogenic shock due to influenza virus-related myocarditis. *Eur Respir J* 2020; 56: 2000925 [https://doi.org/10.1183/13993003.00925-2020].

This single-page version can be shared freely online.

## ABSTRACT

**Background:** There is scarce evidence for mechanical circulatory support (MCS) in patients with influenza-related myocarditis complicated by refractory cardiogenic shock (rCS). We sought to investigate the impact of MCS using combined veno-arterial extracorporeal membrane oxygenation (VA-ECMO) and micro-axial flow pumps (the ECMELLA concept) in influenza-related myocarditis complicated by rCS.

**Methods:** This is a prospective, observational analysis from the single centre HAnnover Cardiac Unloading REgistry (HACURE) from two recent epidemic influenza seasons. We analysed patients with verified influenza-associated myocarditis complicated by rCS who were admitted to our intensive care unit (ICU) on MCS. Subsequently, we performed a propensity score (PS) matched analysis to patients with acute myocardial infarction (AMI) complicated by rCS and non-ischaemic cardiomyopathy (DCM) related rCS.

**Results:** We describe a series of seven patients with rCS-complicated influenza-related myocarditis (mean age 56 ± 10 years, 58% male, influenza A (n=2)/influenza B (n=5)). No patient had been vaccinated prior to the influenza season. MCS was provided using combined VA-ECMO and Impella micro-axial flow pump. In two patients with out-of-hospital cardiac arrest, VA-ECMO had been implanted for extracorporeal cardiopulmonary resuscitation. All patients died within 18 days of hospital admission. By PS-based comparison to patients with AMI- or DCM-related rCS and combined MCS, 30-day mortality was significantly higher in influenza-related rCS.

**Conclusion:** Despite initial stabilisation with combined MCS in patients with rCS-complicated influenza-related myocarditis, the detrimental course of shock could not be stopped and all patients died. Influenza virus infection potentially critically affects other organs besides the heart, leading to irreversible end-organ damage that MCS cannot compensate for and, therefore, results in a devastating outcome.
